# Supplementary material for: CDK4 inactivation inhibits apoptosis via mitochondria-ER contact remodeling in triple-negative breast cancer
Source: PubMed Central journal article supplement (PMC11718081; doi:10.1038/s41467-024-55605-z), 2025-01-09
Supplement: 41467_2024_55605_MOESM1_ESM.pdf [file 41467_2024_55605_MOESM1_ESM.pdf]

# Supplementary Figure 1

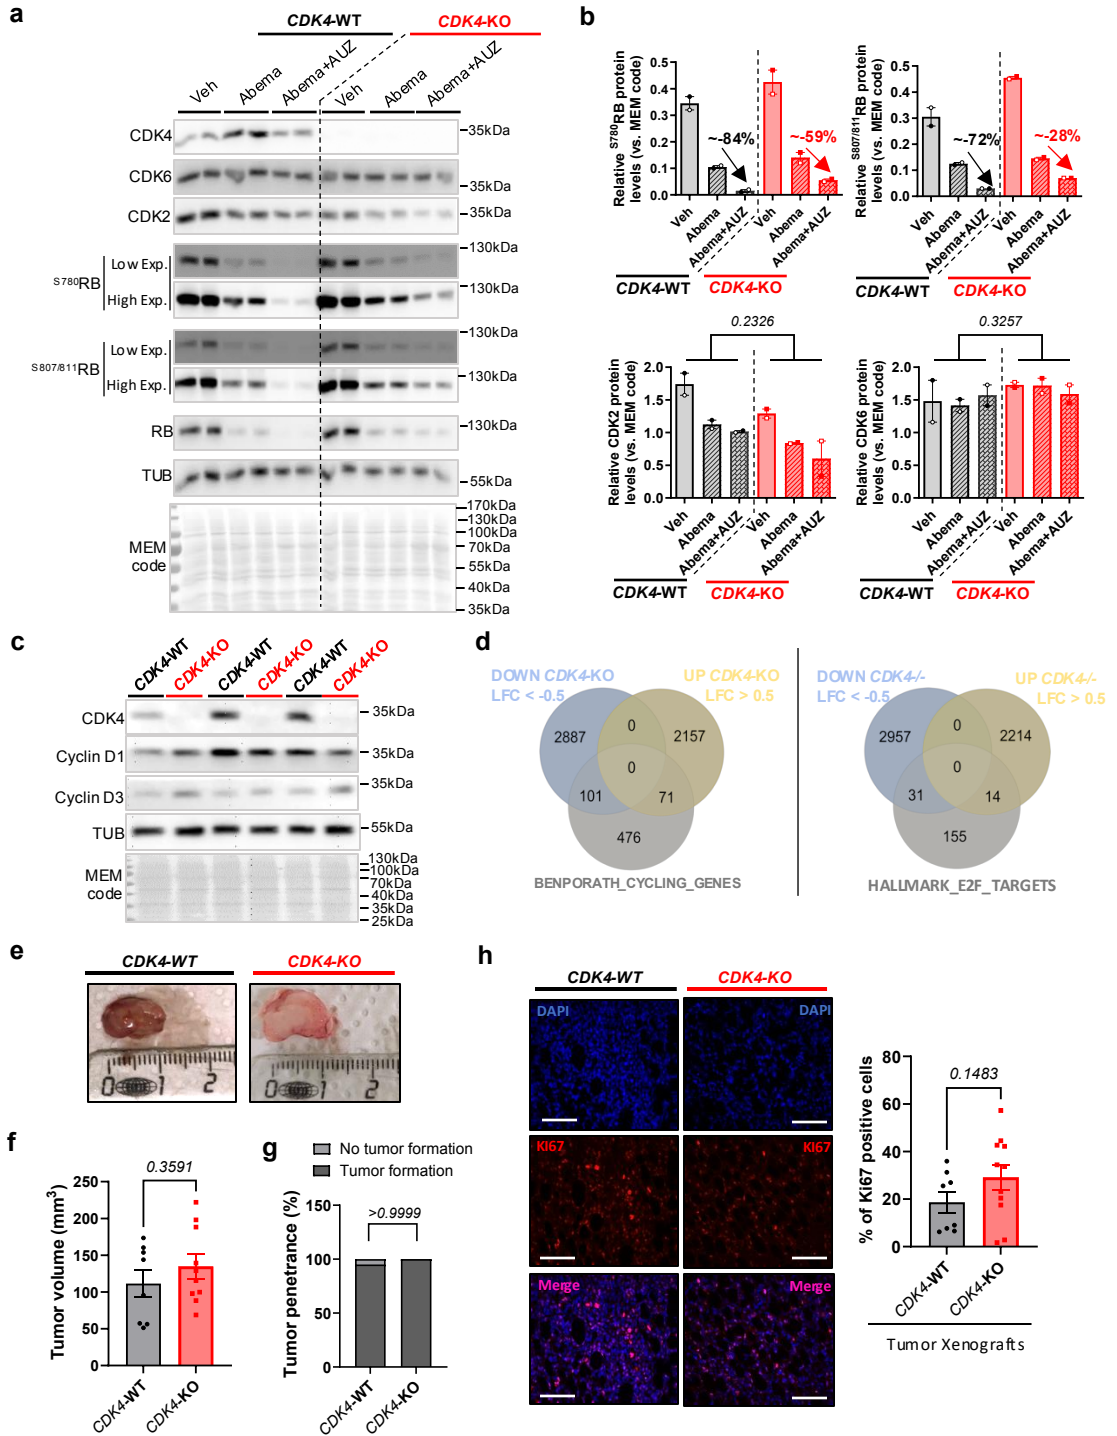

# Supplementary Figure 2

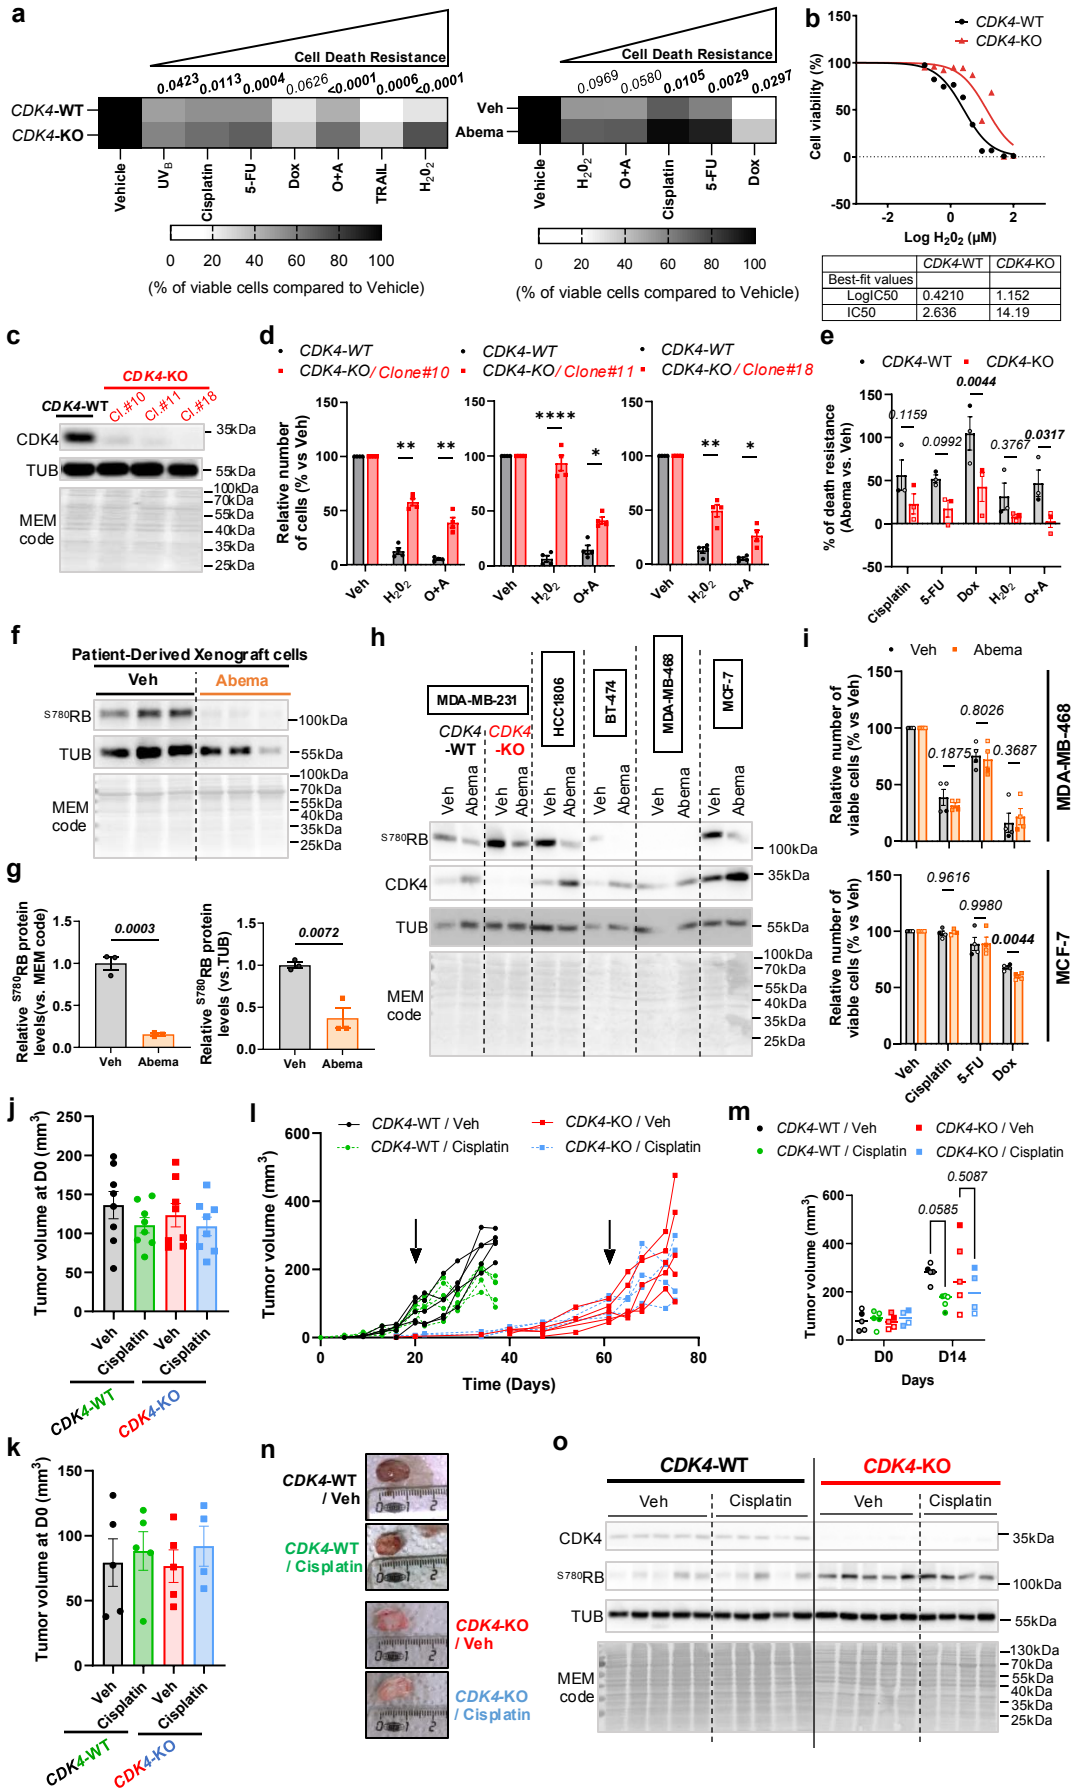

# Supplementary Figure 3

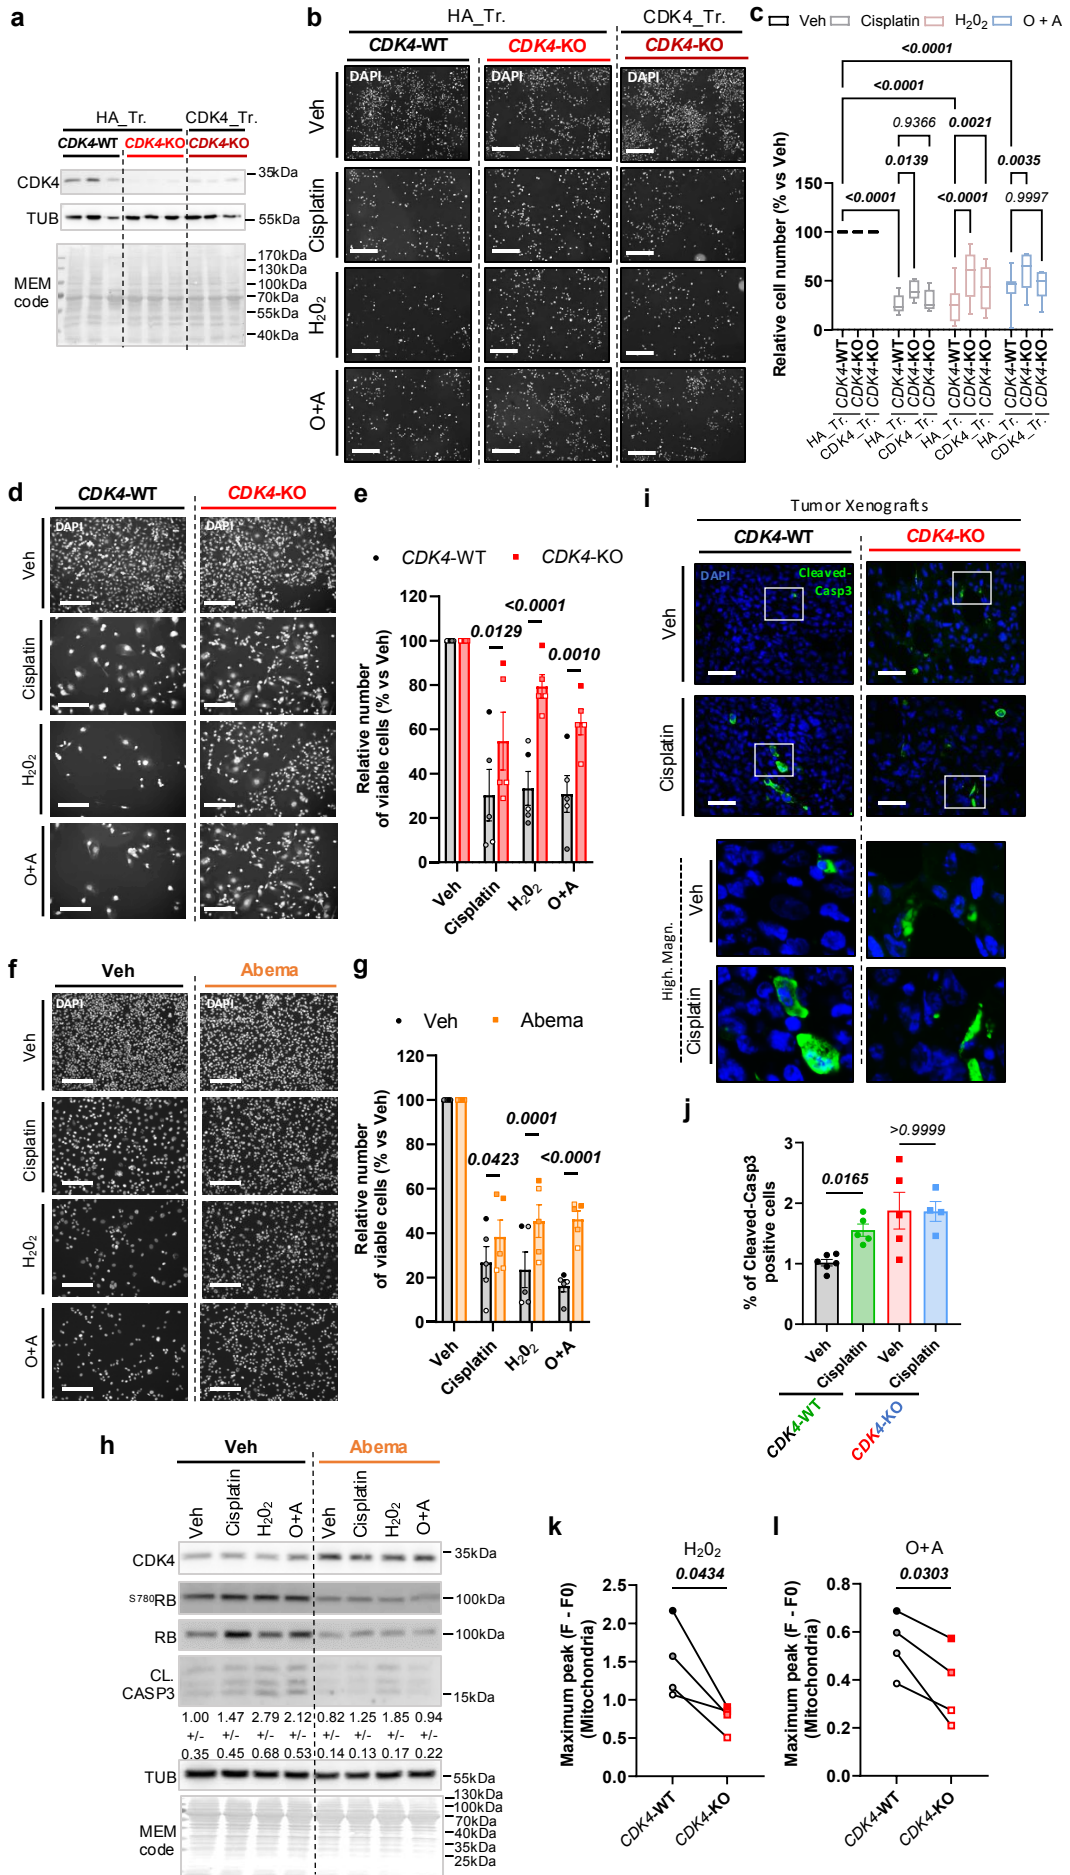

# Supplementary Figure 4

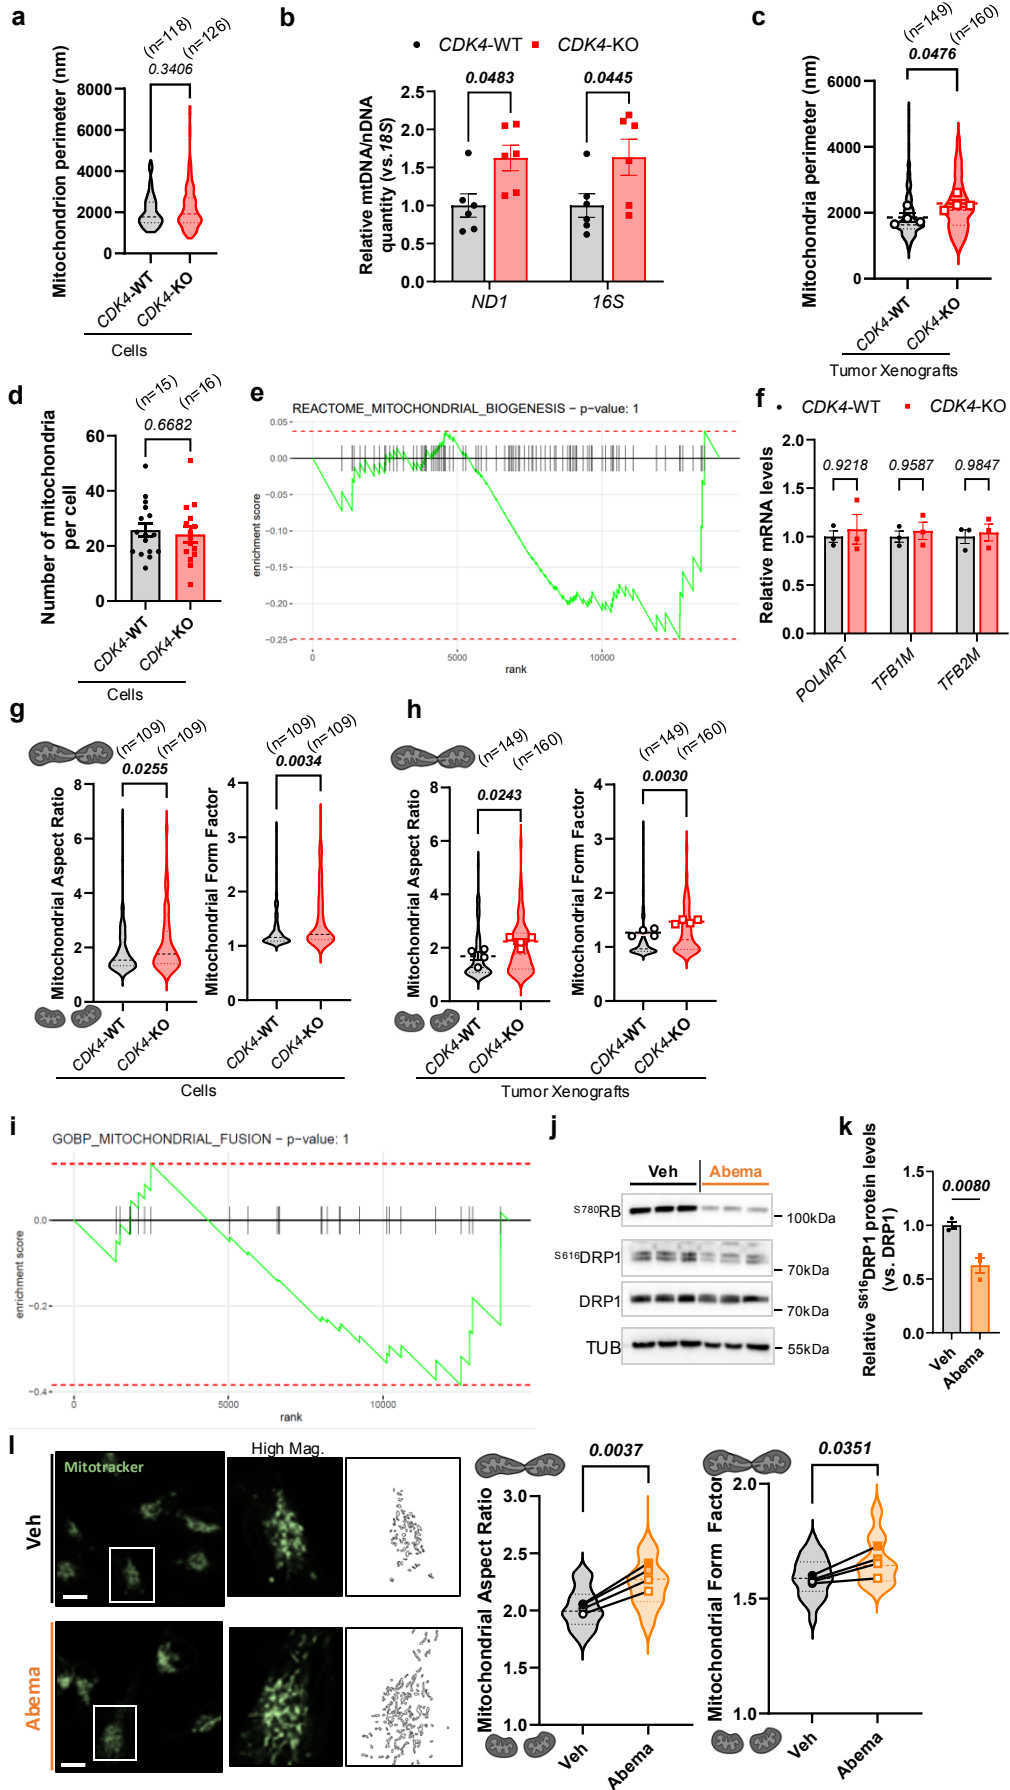

# Supplementary Figure 5

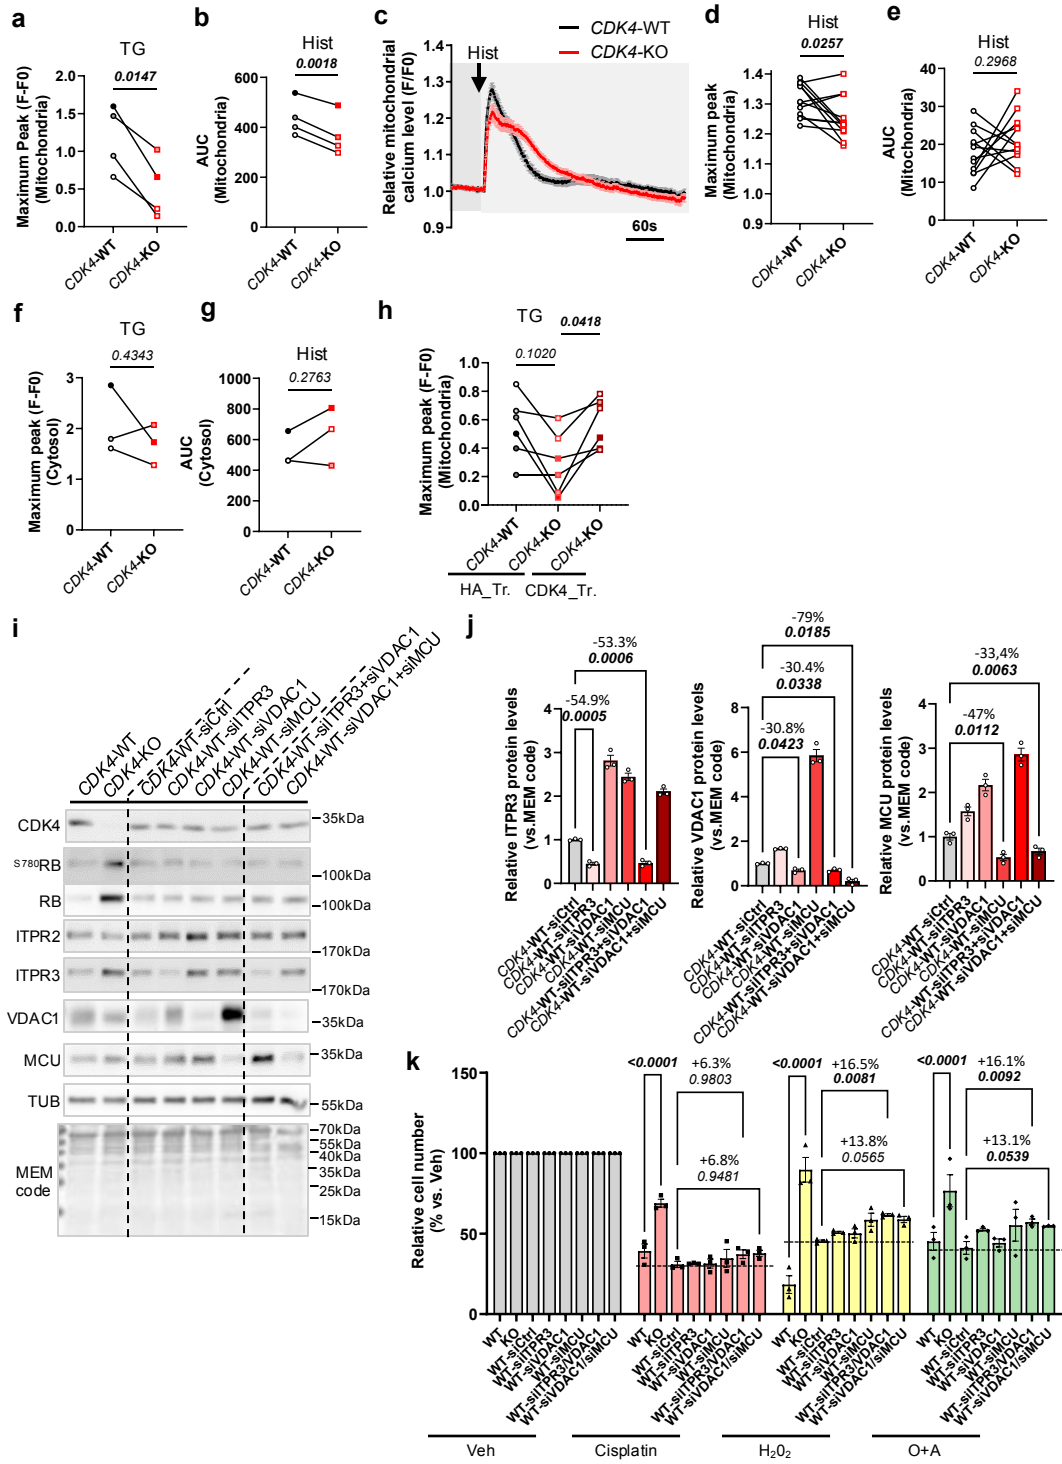



# Supplementary Figure 6

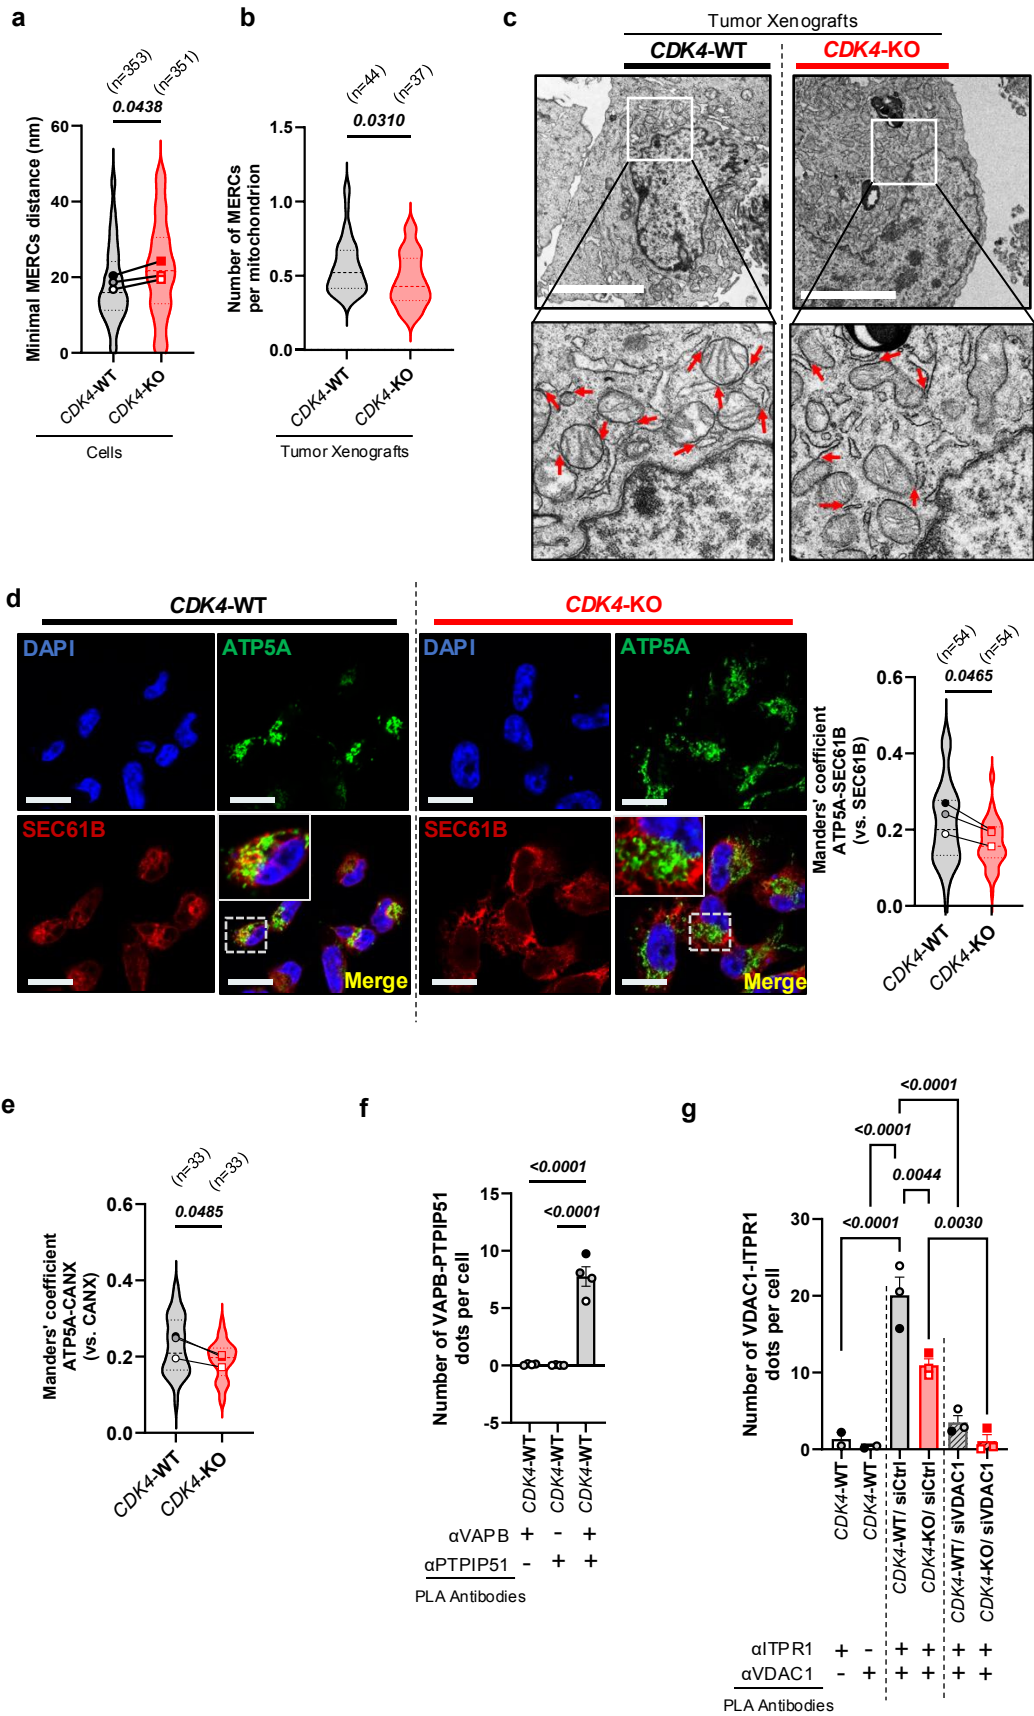

# Supplementary Figure 7

a

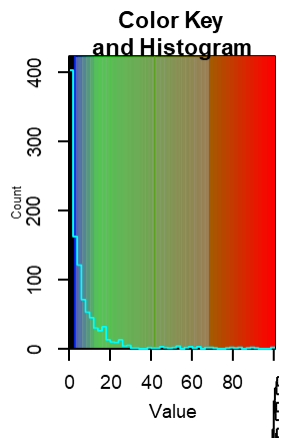

### InKA

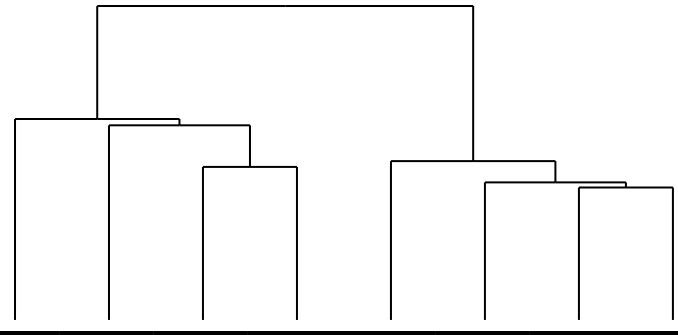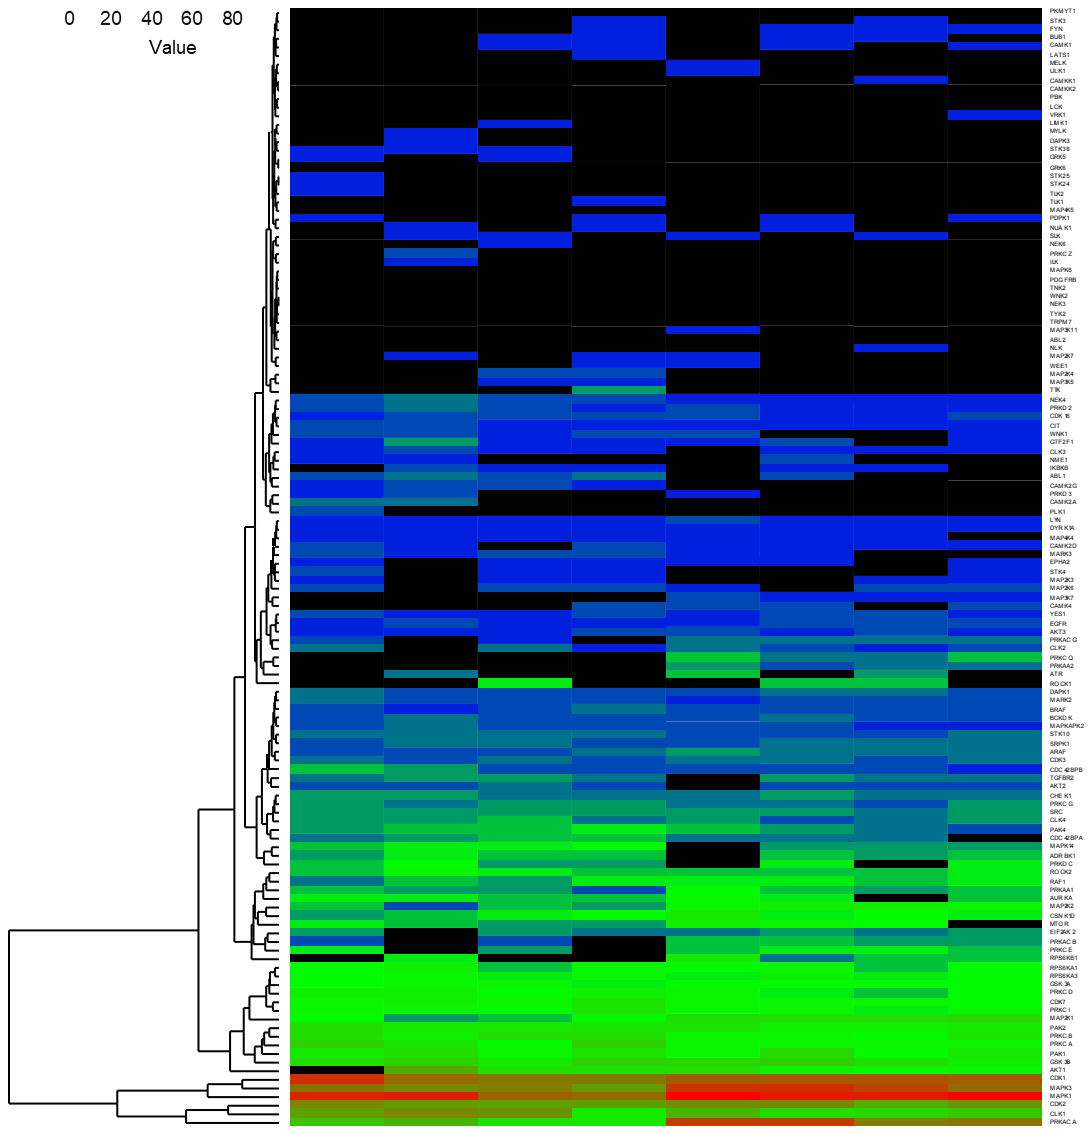

X62 X61 X59 X60 X56 X58 X57 X55

**CDK4-KO** **CDK4-WT**

# Supplementary Figure 7

**b**

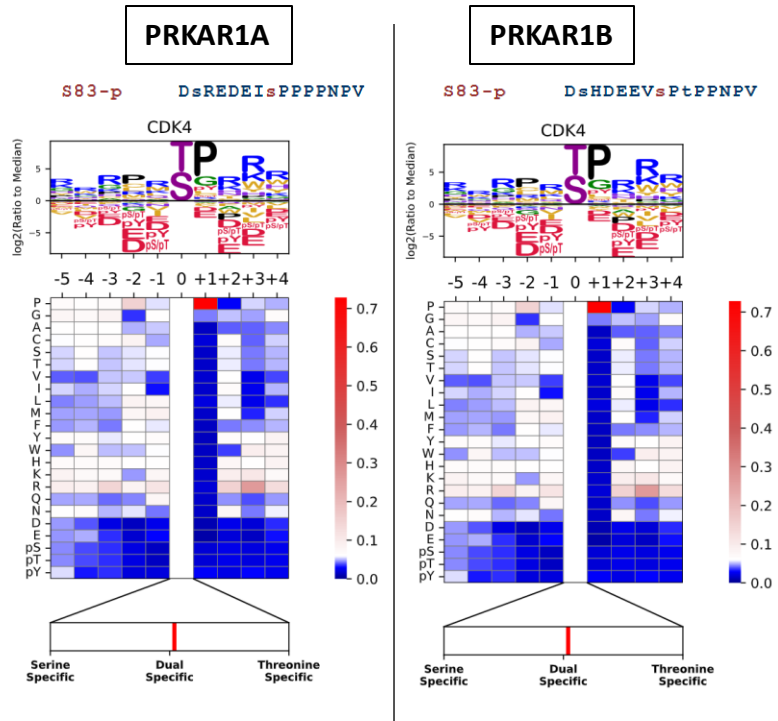

**c**

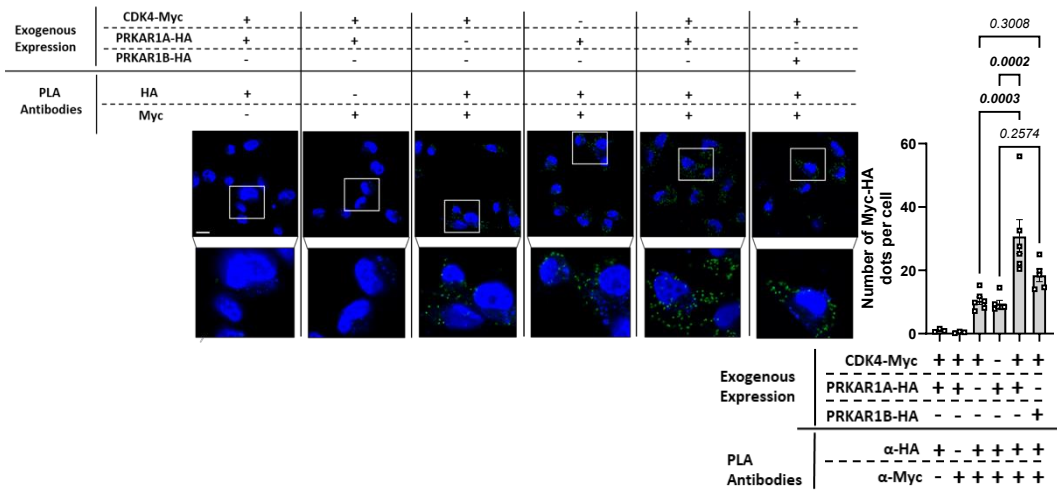



# Supplementary Figure 8

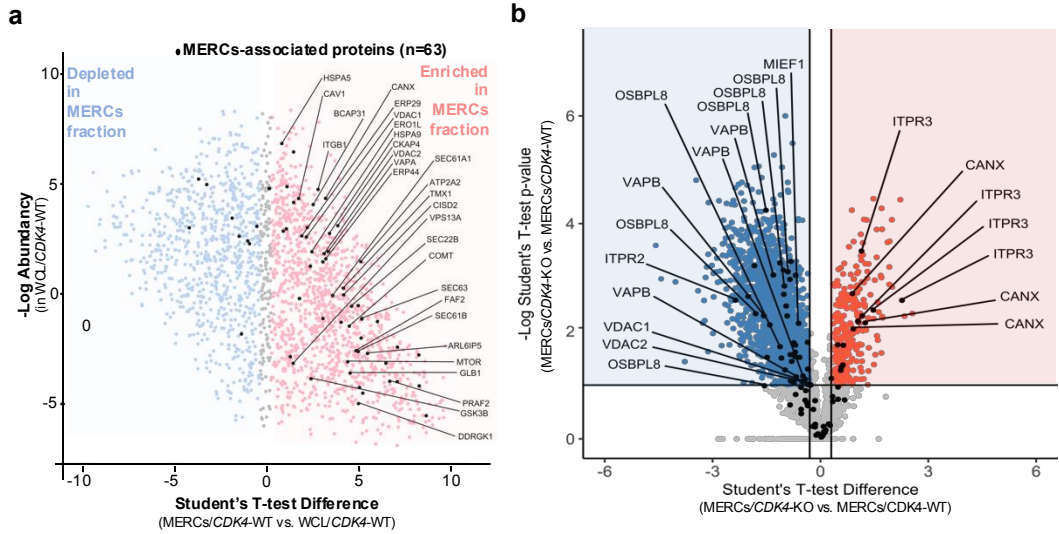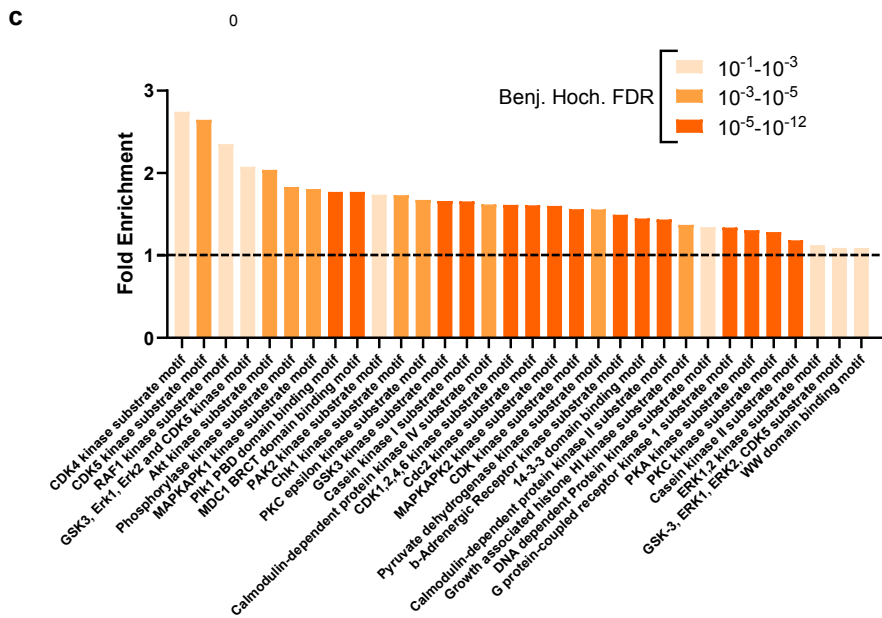

# Supplementary Figure 9

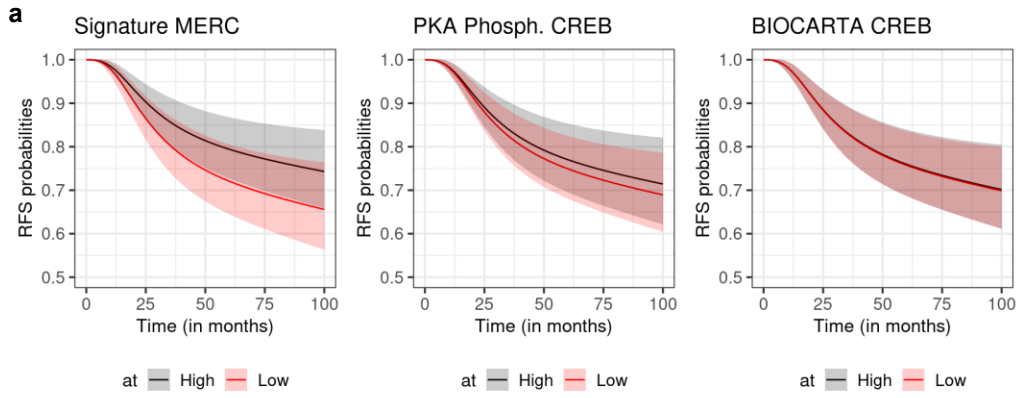

# Supplementary Figure 10

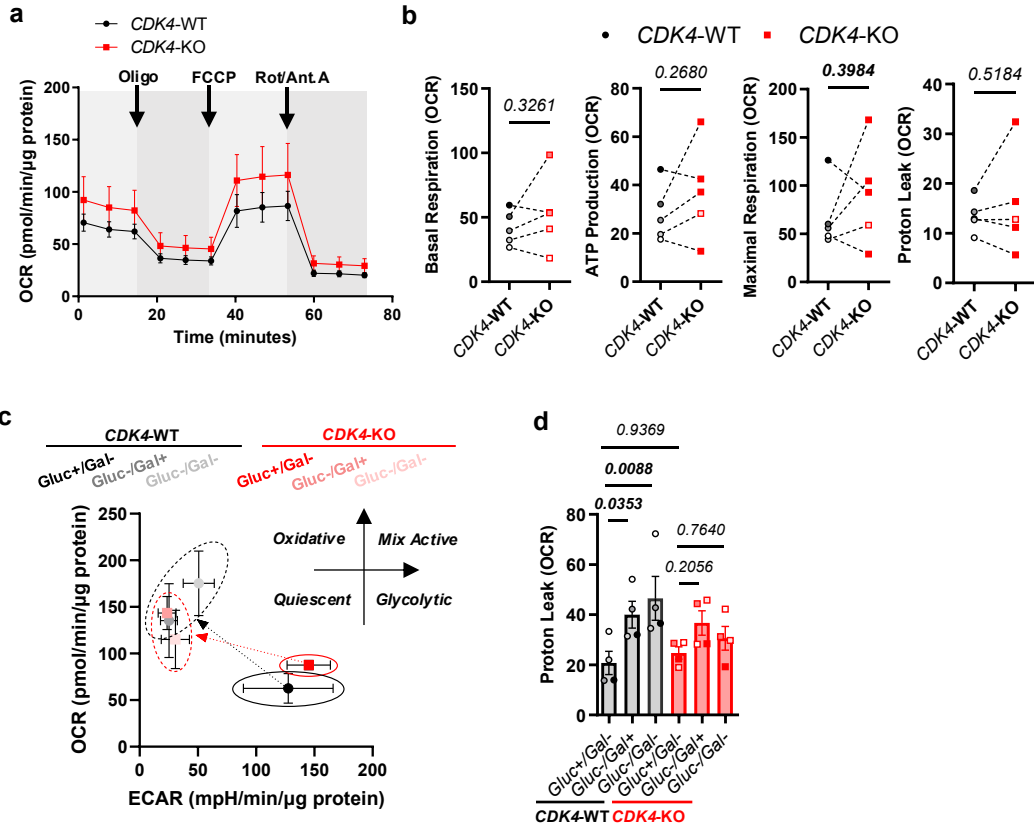

Supplementary Figure 11

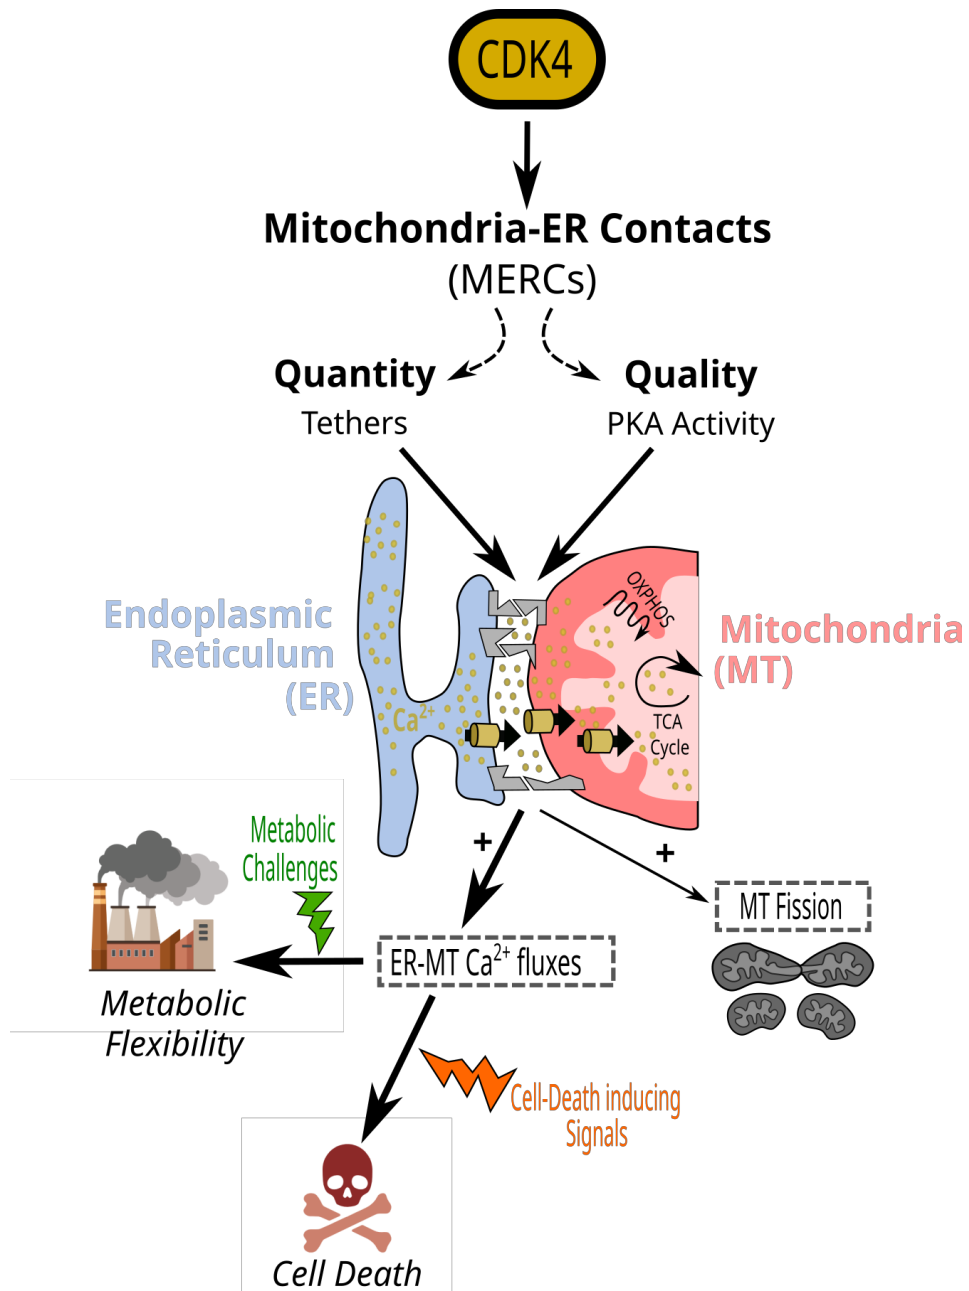

**Supplementary Table 1**

|         |        |          |         |          |        |         |         |
|---------|--------|----------|---------|----------|--------|---------|---------|
| ACSL4   | BECN1  | EIF2AK3  | HSP90B1 | MTOR     | PPID   | SACM1L  | TARDBP  |
| AHCYL1  | BOK    | ERN1     | HSPA5   | MTX2     | PPP2CA | SAR1A   | TBL2    |
| AKT1    | BRCA1  | ERO1L    | HSPA9   | NAPG     | PPP2R4 | SAR1B   | TCHP    |
| AKT2    | CABP1  | ERP29    | INF2    | NCS1     | PRAF2  | SCCPDH  | TDRKH   |
| AKT3    | CALR   | ERP44    | ITGB1   | NDUFA8   | PRRX1  | SEC22B  | TESPA1  |
| ANXA7   | CANX   | EXD2     | ITPR1   | NDUFB6   | PSEN1  | SEC61A1 | TGM2    |
| APP     | CAV1   | FAF2     | ITPR2   | NLRP3    | PSEN2  | SEC61B  | TMX1    |
| ARL6IP5 | CCDC47 | FATE1    | ITPR3   | NOX4     | PTEN   | SEC63   | TOMM70A |
| ARMCX3  | CDIP1  | FIS1     | KRAS    | OCIAD1   | PTRH2  | SEPN1   | TP53    |
| ATAD3A  | CIB1   | FKBP10   | LRRC59  | OSBPL5   | PYCARD | SHC1    | TSPO    |
| ATF6    | CISD2  | FKBP8    | MAVS    | OSBPL8   | RAB1A  | SIGMAR1 | TXNIP   |
| ATG14   | CKAP4  | FUNDC1   | MCL1    | PACS2    | REEP1  | SLC25A4 | UBXN4   |
| ATP2A1  | CLCC1  | FUNDC2   | MCU     | PARK2    | RHOT1  | SLC25A5 | VAPA    |
| ATP2A2  | COMT   | FUS      | MCUR1   | PARK7    | RICTOR | SLC25A6 | VAPB    |
| ATP2A3  | CPD    | GDAP1    | MFF     | PDIA3    | RMDN3  | SNCA    | VDAC1   |
| BAK1    | CYB5R3 | GLB1     | MFN1    | PDK4     | RPS7   | SOD1    | VDAC2   |
| BAP1    | CYC1   | GSK3B    | MFN2    | PDZD8    | RTN1   | SRPRB   | VDAC3   |
| BAX     | CYCS   | HK2      | MICU1   | PGRMC1   | RTN4   | STARD1  | VPS13A  |
| BCAP31  | DDRKG1 | HMOX2    | MICU2   | PGRMC2   | RYR1   | STAT3   | VPS13C  |
| BCL2    | DHCR7  | HNRNPR   | MIEF1   | PINK1    | RYR2   | STT3B   | VPS13D  |
| BCL2L1  | DNM1L  | HRAS     | MIEF2   | PML      | RYR3   | STX17   | WAVE3   |
| BCL2L13 | EEF1D  | HSD17B12 | MOSPD2  | PPARGC1A | S100A1 | SYNJ2BP | WFS1    |

**Supplementary Table 2**

| Gene Name | Main-associated Functions |                  |           | Gene Name | Main-associated Functions |                  |           |
|-----------|---------------------------|------------------|-----------|-----------|---------------------------|------------------|-----------|
| ACSL4     | Lipids                    |                  |           | MICU1     | Ions Transport            |                  |           |
| AHCYL1    | Others                    |                  |           | MICU2     | Ions Transport            |                  |           |
| AKT1      | Oncogenes                 |                  |           | MEF1      | MT Dynamics               |                  |           |
| AKT2      | Oncogenes                 |                  |           | MEF2      | MT Dynamics               |                  |           |
| AKT3      | Oncogenes                 |                  |           | MOSP2     | Tethering                 | Lipids           |           |
| ANXA7     | Ions Transport            |                  |           | MTOR      | Autophagy                 | Signalling       |           |
| APP       | Others                    |                  |           | MTX2      | MT Bioenergetics          |                  |           |
| ARL8P5    | MT Bioenergetics          |                  |           | NAPG      | ER Homeostasis            |                  |           |
| ARMCX3    | MT Dynamics               |                  |           | NDUFA8    | MT Bioenergetics          |                  |           |
| ATAD3A    | Tethering                 |                  |           | OCIAD1    | MT Bioenergetics          |                  |           |
| ATF6      | ER Homeostasis            |                  |           | OSBP5     | Tethering                 | Lipids           |           |
| ATG14     | Autophagy                 |                  |           | OSBP8     | Tethering                 | Lipids           |           |
| ATP2A2    | Ions Transport            |                  |           | PARK7     | MT Bioenergetics          |                  |           |
| BAK1      | Apoptosis                 |                  |           | PDZD8     | Tethering                 |                  |           |
| BAP1      | Apoptosis                 |                  |           | PGRMC1    | Ions Transport            |                  |           |
| BAX       | Apoptosis                 |                  |           | PGRMC2    | Others                    |                  |           |
| BCAP31    | Tethering                 |                  |           | PML       | Apoptosis                 |                  |           |
| BCL2      | Apoptosis                 |                  |           | PPID      | Tethering                 |                  |           |
| BCL2L1    | Apoptosis                 |                  |           | PPP2CA    | Signalling                |                  |           |
| BCL2L13   | Apoptosis                 |                  |           | PPP2R4    | Signalling                |                  |           |
| BECN1     | Apoptosis                 |                  |           | PRAF2     | Others                    |                  |           |
| CALR      | ER Homeostasis            | Ions Transport   |           | PSEN1     | Tethering                 |                  |           |
| CANX      | Ions Transport            |                  |           | PTEN      | Oncogenes                 |                  |           |
| CAV1      | Ions Transport            |                  |           | PTRH2     | Apoptosis                 |                  |           |
| CCDC47    | Ions Transport            |                  |           | PYCARD    | Apoptosis                 |                  |           |
| CIB1      | ER Homeostasis            | Ions Transport   |           | RAB1A     | ER Homeostasis            |                  |           |
| CISD2     | Tethering                 |                  |           | RHOT1     | Tethering                 |                  |           |
| CKAP4     | Others                    |                  |           | RICTOR    | Autophagy                 | Signalling       |           |
| CLCC1     | Ions Transport            |                  |           | RMDN3     | Tethering                 |                  |           |
| COMT      | MT Bioenergetics          |                  |           | RPS7      | ER Homeostasis            |                  |           |
| CPD       | Others                    |                  |           | RTN4      | ER Homeostasis            |                  |           |
| CYB5R3    | MT Bioenergetics          |                  |           | RYR3      | Ions Transport            |                  |           |
| CYC1      | MT Bioenergetics          |                  |           | SACM1L    | ER Homeostasis            | Lipids           |           |
| CYCS      | MT Bioenergetics          | Apoptosis        |           | SAR1A     | ER Homeostasis            |                  |           |
| DDRGK1    | ER Homeostasis            |                  |           | SAR1B     | Others                    |                  |           |
| DHCR7     | Lipids                    |                  |           | SCCPDH    | Others                    |                  |           |
| DNM1L     | MT Dynamics               |                  |           | SEC22B    | ER Homeostasis            |                  |           |
| EEF1D     | Others                    |                  |           | SEC61A1   | ER Homeostasis            | Ions Transport   |           |
| EF2AK3    | ER Homeostasis            | Lipids           | Tethering | SEC61B    | ER Homeostasis            |                  |           |
| ERO1L     | ER Homeostasis            |                  |           | SEC63     | ER Homeostasis            |                  |           |
| ERP29     | ER Homeostasis            |                  |           | SHC1      | Signalling                |                  |           |
| ERP44     | ER Homeostasis            | Ions Transport   |           | SIGMAR1   | Tethering                 |                  |           |
| EXD2      | MT Bioenergetics          |                  |           | SLC25A4   | MT Bioenergetics          |                  |           |
| FAF2      | ER Homeostasis            |                  |           | SLC25A5   | MT Bioenergetics          |                  |           |
| FIS1      | Tethering                 |                  |           | SLC25A6   | MT Bioenergetics          |                  |           |
| FKBP8     | Tethering                 |                  |           | SRPRB     | ER Homeostasis            |                  |           |
| FUNDC2    | Autophagy                 | MT Dynamics      |           | STT3B     | ER Homeostasis            |                  |           |
| FUS       | Tethering                 |                  |           | STX17     | Autophagy                 | Tethering        |           |
| GLB1      | Autophagy                 |                  |           | SYNJ2BP   | Tethering                 |                  |           |
| GSK3B     | MT Bioenergetics          |                  |           | TARDBP    | Ions Transport            |                  |           |
| HK2       | MT Bioenergetics          |                  |           | TBL2      | ER Homeostasis            |                  |           |
| HMOX2     | ER Homeostasis            |                  |           | TCHP      | Tethering                 |                  |           |
| HNRNP9    | Others                    |                  |           | TDRKH     | Others                    |                  |           |
| HSD17B12  | Lipids                    | MT Bioenergetics |           | TGM2      | Ions Transport            |                  |           |
| HSP90B1   | ER Homeostasis            |                  |           | TMX1      | ER Homeostasis            | MT Bioenergetics |           |
| HSPA5     | ER Homeostasis            | Tethering        |           | TOMM70A   | MT Dynamics               |                  |           |
| HSPA9     | Tethering                 |                  |           | TP53      | Signalling                | Apoptosis        |           |
| INF2      | MT Dynamics               |                  |           | TSP0      | Lipids                    |                  |           |
| ITGB1     | Signalling                |                  |           | TXNP      | Signalling                |                  |           |
| ITPR2     | Ions Transport            | Tethering        |           | UBXN4     | ER Homeostasis            |                  |           |
| ITPR3     | Ions Transport            |                  |           | VAPA      | Tethering                 |                  |           |
| KRAS      | Oncogenes                 |                  |           | VAPB      | Tethering                 |                  |           |
| LRRC9     | Others                    |                  |           | VDAC1     | Ions Transport            |                  |           |
| MAVS      | Signalling                |                  |           | VDAC2     | Ions Transport            |                  |           |
| MCL1      | Apoptosis                 |                  |           | VDAC3     | Ions Transport            |                  |           |
| MCU       | Ions Transport            |                  |           | VPS13A    | Lipids                    |                  |           |
| MCUR1     | Ions Transport            |                  |           | VPS13C    | Lipids                    |                  |           |
| MFF       | MT Dynamics               |                  |           | VPS13D    | Tethering                 | Lipids           |           |
| MFN1      | MT Dynamics               | Tethering        |           | WFS1      | ER Homeostasis            | Ions Transport   | Tethering |
| MFN2      | MT Dynamics               | Tethering        |           |           |                           |                  |           |

MT : Mitochondria; ER : Endoplasmic Reticulum



### Supplementary Table 3

| term             | type_analysis | HR   | conf.low | conf.high | p.value |
|------------------|---------------|------|----------|-----------|---------|
| CCND1            | RFS           | 1.09 | 0.72     | 1.65      | 0.688   |
| CCND2            | RFS           | 0.78 | 0.61     | 0.99      | 0.045   |
| CCND3            | RFS           | 0.95 | 0.52     | 1.73      | 0.857   |
| Signature CCNDs  | RFS           | 0.89 | 0.74     | 1.06      | 0.178   |
| CDK4             | RFS           | 1.48 | 0.69     | 3.15      | 0.314   |
| MERC             | RFS           | 1.01 | 0.98     | 1.03      | 0.610   |
| PKA Phosph. CREB | RFS           | 0.99 | 0.91     | 1.07      | 0.785   |
| BIOCARTA CREB    | RFS           | 0.99 | 0.92     | 1.06      | 0.710   |
| CCND1            | OS            | 1.21 | 0.83     | 1.76      | 0.321   |
| CCND2            | OS            | 0.77 | 0.63     | 0.95      | 0.014   |
| CCND3            | OS            | 0.69 | 0.42     | 1.14      | 0.145   |
| Signature CCNDs  | OS            | 0.88 | 0.76     | 1.01      | 0.071   |
| CDK4             | OS            | 1.55 | 0.84     | 2.84      | 0.161   |
| MERC             | OS            | 1.00 | 0.98     | 1.02      | 0.771   |
| PKA Phosph. CREB | OS            | 1.00 | 0.94     | 1.07      | 0.930   |
| BIOCARTA CREB    | OS            | 0.96 | 0.91     | 1.03      | 0.245   |

**Supplementary Table 4**

| <b>Gene</b>                     | <b>Sequence</b>           |
|---------------------------------|---------------------------|
| <b><i>Human</i></b>             |                           |
| <i>ND1</i> (mt.DNA) - Forward   | CACCCAAGAACAGGGTTTGT      |
| <i>ND1</i> (mt.DNA) - Reverse   | TGGCCATGGGTATGTTGTTAA     |
| <i>16S</i> (mt.DNA) - Forward   | CGAAAGGACAAGAGAAATAAGG    |
| <i>16S</i> (mt.DNA) - Reverse   | CTGTAAGTTTTAAGTTTTATGCCG  |
| <i>18S</i> (nucl.DNA) - Forward | ACGGACCAGAGCGCGAAAGCA     |
| <i>18S</i> (nucl.DNA) - Reverse | GACATCTAAGGGCATCACAGAC    |
| <i>PUM1</i> -Forward            | GCTGCCGTGTTATCCAGAA       |
| <i>PUM1</i> -Reverse            | CCAGAGGCGTACAGGGATAG      |
| <i>POLMRT</i> -Forward          | ACGGAGACATCAGCCGAAAG      |
| <i>POLMRT</i> -Reverse          | GGCCCTTCTGTAGCAGTG        |
| <i>TFB 1M</i> -Forward          | CGGAAAACCTCAGCACTTGCC     |
| <i>TFB 1M</i> -Reverse          | ACAATCTTATCTGTCAGCCTCAAGT |
| <i>TFB 2M</i> -Forward          | ATGTCTTCTCGAGGGCTCTTT     |
| <i>TFB 2M</i> -Reverse          | TTAAGGGATGTCTGCTGTCCAA    |

**Supplementary Table 5**

| <b>Protein</b>                | <b>Reference</b>                                   | <b>Use</b> | <b>Dilution</b>  |
|-------------------------------|----------------------------------------------------|------------|------------------|
| <b>CDK2</b>                   | sc-163 (M2) (Santa Cruz)                           | WB         | 1/1000           |
| <b>CDK4</b>                   | #1790 (D9G3E) (Cell Signaling Technology)          | WB         | 1/1000           |
| <b>CDK6</b>                   | #3136 (DCS83) (Cell Signaling Technology)          | WB         | 1/2000           |
| <b>Cyclin D1</b>              | PA5-16607 (ThermoFisher)                           | WB         | 1/250            |
| <b>Cyclin D3</b>              | ab28283 [DCS2.2] (Abcam)                           | WB         | 1/1000           |
| <b>S789RB</b>                 | #8180 (D59B7) (Cell Signaling Technology)          | WB         | 1/1000           |
| <b>RB</b>                     | sc-50 (C-15) (SantaCruz)                           | WB         | 1/1000           |
| <b>Cleaved Casp-3</b>         | #9664 (5A1E) (Cell Signaling Technology)           | WB         | 1/1000           |
| <b>S616DRP1</b>               | #4494 (D9A1) (Cell Signaling Technology)           | WB         | 1/1000           |
| <b>DRP1</b>                   | #5391 (D8H5) (Cell Signaling Technology)           | WB         | 1/1000           |
| <b>SERCA 1</b>                | Ab129104 [EPR7322] (Abcam)                         | WB         | 1/1000           |
| <b>S1756ITPR1</b>             | #3760 (Cell Signaling)                             | WB         | 1/1000           |
| <b>ITPR1</b>                  | 07-1213 (MERCCK) Lot#3546915                       | WB<br>PLA  | 1/1000<br>1/2000 |
| <b>ITPR2</b>                  | sc-398434 (A-5) (Santa Cruz)                       | WB         | 1/1000           |
| <b>ITPR3</b>                  | 610313 (BD Tr.) Lot#2/IP3R-3                       | WB         | 1/1000           |
| <b>VDAC1</b>                  | ab14734 (Abcam) Lot[20B12AF2]                      | WB<br>PLA  | 1/1000<br>1/1000 |
| <b>MCU</b>                    | HPA016480-100UL (Sigma)                            | WB         | 1/1000           |
| <b>PKA Phospho-substrates</b> | #9624 (100G7E) (Cell Signaling Technology)         | WB         | 1/1000           |
| <b>CALR</b>                   | #12238 (D3E6) XP® (Cell Signaling Technology)      | WB         | 1/1000           |
| <b>SEC61B</b>                 | #14648 (D5Q1W) (Cell Signaling Technology)         | IF         | 1/200            |
| <b>CANX</b>                   | 10427-2-AP (LubioScience)                          | IF         | 1/200            |
| <b>PDH</b>                    | Ab110334 (Abcam)                                   | WB         | 1/1000           |
| <b>GRP75</b>                  | #2816 (Cell Signaling Technology)                  | WB         | 1/1000           |
| <b>MFN2</b>                   | #11925 (D1E9) (Cell Signaling Technology)          | WB         | 1/1000           |
| <b>PRKAR1A</b>                | #5675 (D54D9) (Cell Signaling Technology)          | WB         | 1/1000           |
| <b>TUB</b>                    | T6199-200UL (Sigma)                                | WB         | 1/5000           |
| <b>ATP5A</b>                  | ab14748 [15H4C4] (Abcam)                           | IF         | 1/500            |
| <b>PKACA</b>                  | #4782 (Cell Signaling Technology)                  | IF         | 1/50             |
| <b>VAPB</b>                   | 15514012 (Invitrogen/Thermofischer)                | PLA        | 1/500            |
| <b>PTPIP51</b>                | Orb101821 (BIORBYT Ltd)                            | PLA        | 1/1000           |
| <b>HA</b>                     | #3724 HA-Tag (C29F4) (Cell Signaling Technology)   | PLA        | 1/1000           |
| <b>Myc</b>                    | #2276 Myc-Tag (9B11) ) (Cell Signaling Technology) | PLA        | 1/1000           |
| <b>γH2AX</b>                  | #2577 (Cell Signaling Technology)                  | IF         | 1/1000           |
| <b>BCL-xL</b>                 | #2762 (Cell Signaling Technology)                  | WB         | 1/1000           |
| <b>BCL-2</b>                  | #2876 (Cell Signaling Technology)                  | WB         | 1/1000           |
| <b>S112BAD</b>                | ab129192 [EPR1891(2)] (Abcam)                      | WB         | 1/500            |
| <b>BAD</b>                    | #9292 (Cell Signaling Technology)                  | WB         | 1/1000           |
| <b>BAX</b>                    | #2772 (Cell Signaling Technology)                  | WB         | 1/1000           |
| <b>Cytochrome C</b>           | #11940 (D18C7) (Cell Signaling Technology)         | WB         | 1/1000           |

WB: Western Blot, IF: Immunofluorescence, PLA: Proximity Ligation Assay

**Supplementary Figure 1: CDK4 is dispensable for TNBC tumor growth *in vitro* and *in vivo***

**a-b** Immunoblots and relative protein levels of CDK4, CDK6, CDK2, <sup>S780</sup>RB, <sup>S807/S811</sup>RB, RB, Tubulin (TUB) and MEM code of CDK4-WT and CDK4-KO MDA-MB-231 TNBC cells, treated for 48 hours without (Veh) or with abemaciclib (Abema), or a combination abemaciclib + CDK2 inhibitor (Abema+AUZ). CDK2inhibitor=AUZ=AUZ-454. N=2 independent biological replicates. 2-way ANOVA; Sidák's multiple comparison tests and genotype effects. **c** Immunoblots and relative protein levels of CDK4, Cyclin D1, Cyclin D3 and Tubulin, of CDK4-WT and -KO TNBC cells, N=3 independent biological replicates. **d** Venn diagram for RNA-seq data for genes differentially downregulated (log fold change <-0.5) or upregulated (log fold change > 0.5) and intersection with GSEA from cycling genes or E2F-target associated. **e-f** Representative tumor xenograft pictures and tumor xenograft volume at the sacrifice. N=8 WT and N=10 KO. Two-sided Unpaired T-test. **g** Tumor xenograft penetrance. N=20 WT and N=10 KO tumor xenografts. Two-sided Fisher's exact test. **h** Immunofluorescence of slices of CDK4-WT and -KO xenografts for Ki67 (red channel) and DAPI (blue channel). Representative pictures and associated quantification of Ki67 positive cells. Scale bars: 200  $\mu$ m. N=8 WT and N=11 KO. Two-sided Unpaired T-test. Exact *p-values* are displayed in italic (bold italic if <0.05).

**Supplementary Figure 2: CDK4 inhibition confers to TNBC cells resistance to chemotherapy *in vitro* and *in vivo***

**a** Percentage of viable cells compared of CDK4-WT and CDK4-KO MDA-MB-231 TNBC cells or pretreated with Vehicle or Abemaciclib (Abema) for 2 days, upon treatment with Vehicle, Cisplatin (10 $\mu$ M), 5-FU (20 $\mu$ M), or Doxorubicin (5 $\mu$ M) (Dox), H<sub>2</sub>O<sub>2</sub> (250 $\mu$ M-2hours), or Oligomycin and Antimycin (O+A) (1+10 $\mu$ M-2hours), UV<sub>B</sub> (30mJ/cm<sup>2</sup>) or TRAIL (2  $\mu$ g/mL). N=3 biological replicates. 2-way ANOVA; Sidák's multiple comparison tests. **b** IC50 values for H<sub>2</sub>O<sub>2</sub> treatment in CDK4-WT and -KO TNBC cells. Representative of N=3 independent biological replicates. **c** Immunoblots of CDK4, Tubulin and MEM code number of CDK4-WT and different CDK4-KO clones (#10, #11 and #18), TNBC. **d** Quantification of the number of CDK4-WT and different CDK4-KO clones of TNBC cells, upon treatment with Vehicle, H<sub>2</sub>O<sub>2</sub> or O+A. N=4 biological replicates. 2-way ANOVA; Sidák's multiple comparison tests. **e** Increased percentage of viable cells for each treatment (Cisplatin, 5-FU, Doxorubicin (Dox), H<sub>2</sub>O<sub>2</sub> or O+A) from vehicle- to abemaciclib-treated cells. N=3 biological replicates. 2-way ANOVA; Sidák's multiple comparison tests. **f-g** Immunoblots and relative protein levels of <sup>S780</sup>RB, Tubulin (TUB), MEM code of triple-negative NST breast cancer patient-derived cells treated cells with Vehicle or Abema for 24 hours. N=3 biological replicates. Two-sided Unpaired T-test. **h** Immunoblots of <sup>S780</sup>RB, CDK4, TUB and MEM code of CDK4-WT and -KO MDA-MB-231 cell, HCC1806, BT-474, MDA-MB-168 and MCF-7 cells treated for 48 hours with Vehicle or Abema. **i** Number of viable MDA-MB-468 and MCF-7 cells, pretreated with Vehicle or Abema for 2 days and after treatment with Cisplatin (10 $\mu$ M), 5-FU (20 $\mu$ M),

or Doxorubicin (5 $\mu$ M for MDA-MB-468 and 10 $\mu$ M for MCF-7) (Dox). N=4 biological replicates. 2-way ANOVA; Sidák's multiple comparison tests. **j** Tumor volume of CDK4-WT and -KO tumor xenografts before the start of low Cisplatin (4mg/kg) treatment. 2-way ANOVA; Sidák's multiple comparison tests. **k** Tumor volume of CDK4-WT and -KO tumor xenografts before the start of high-Cisplatin (8mg/kg) treatment. 2-way ANOVA; Sidák's multiple comparison tests. **l** Tumor volume of CDK4-WT and -KO tumor xenografts, treated with vehicle (Veh) or high Cisplatin (8mg/kg). T=Treatment. N=4-5 mice per group. **m** Tumor volume of CDK4-WT and -KO tumor xenografts at sacrifice (D14). 2-way ANOVA; Sidák's multiple comparison tests. Mean +/- SEM of N=8 mice per group. **n** Representative CDK4-WT and -KO tumor xenografts pictures at sacrifice. **o** Immunoblots of CDK4, <sup>5780</sup>RB, Tubulin (TUB) and MEM code of CDK4-WT and -KO tumor xenografts, treated either with Vehicle or Cisplatin. N=4-5 mice per group. CDK4-WT and -KO tumor xenograft samples were loaded in two different gels, with subsequent same antibodies/exposure conditions. Exact *p-values* are displayed in italic (bold italic if <0.05).

### **Supplementary Figure 3: CDK4 regulates cell death modulating mitochondrial effectors of apoptosis in TNBC**

**a** Immunoblots of CDK4, Tubulin (TUB) and MEM code of CDK4-WT, CDK4-KO TNBC cells transfected with empty plasmid HA (HA\_Tr.) and CDK4-KO TNBC cells expressing endogenous CDK4 (CDK4\_Tr.). **b-c** Representative pictures of DAPI staining and quantification of the number of CDK4-WT, CDK4-KO TNBC cells transfected with empty plasmid HA (HA\_Tr.) and CDK4-KO TNBC cells expressing endogenous CDK4 (CDK4\_Tr.), upon treatment with Vehicle, Cisplatin, H<sub>2</sub>O<sub>2</sub>, or Oligomycin and Antimycin (O+A). Scale bars: 400 $\mu$ m. N=5-7 independent biological replicates. Mixed-Effect Analysis; Tukey's multiple comparisons test. **d-e** Representative pictures of DAPI staining and CDK4-WT and—KO MDA-MB-231 TNBC cells, upon treatment with Vehicle, Cisplatin, H<sub>2</sub>O<sub>2</sub>, or Oligomycin and Antimycin (O+A). Scale bars: 200 $\mu$ m. N=5 independent biological replicates. 2-way ANOVA; Sidák's multiple comparison tests. **f-g** Representative pictures of DAPI staining and quantification of the number of viable pretreated cells with Vehicle (Veh) or Abemaciclib (Abema) for 8 days and after treatment with Vehicle, Cisplatin, H<sub>2</sub>O<sub>2</sub>, or Oligomycin and Antimycin (O+A). Scale bars: 400 $\mu$ m. N=5 independent biological replicates. 2-way ANOVA; Sidák's multiple comparison tests. **h** Immunoblots and relative protein levels of CDK4, <sup>5780</sup>RB, RB, Cleaved Caspase-3 (CL.CASP3), Tubulin (TUB) and MEM code of pretreated cells with Vehicle or Abema for 8 days and after treatment with Vehicle, Cisplatin, H<sub>2</sub>O<sub>2</sub>, or Oligomycin and O+A. Quantification of relative cleaved Caspase-3 protein levels (normalized to tubulin level). N=3 independent biological replicates. **i-j** Immunofluorescence of slices of CDK4-WT and -KO xenografts for Cleaved-Caspase 3 (green) and DAPI (blue). Representative pictures and associated quantification of Cleaved-Caspase 3 positive cells. 2-way ANOVA; Dunnett's T3 multiple comparisons tests. **k-l** Maximum amplitude/peak from basal mitochondrial calcium levels upon H<sub>2</sub>O<sub>2</sub>

(2.5 mM) or O+A (100  $\mu$ M, 10  $\mu$ M) injections. N=4 independent biological replicates representing a total of n=135 cells for 10 independent injections (WT-H<sub>2</sub>O<sub>2</sub>), n=123 cells for 9 independent injections (KO-H<sub>2</sub>O<sub>2</sub>), n=128 cells for 9 independent injections (WT-O+A), n=128 cells for 9 independent injections (KO-O+A). Two-sided Paired T-tests. Exact *p-values* are displayed in italic (bold italic if <0.05).

#### **Supplementary Figure 4: CDK4 participates in mitochondrial fission of TNBC**

**a** Mitochondria perimeter of CDK4-WT and CDK4-KO TNBC cells according to electron micrographs. n=mitochondria. Representative of N=1 on 3 independent biological replicates. Two-sided Mann-Whitney Test. **b** Relative ratio of mitochondrial DNA (mtDNA) on nuclear DNA (nDNA). ND1 and 16S mitochondria-encoded genes and 18S nuclear-encoded gene. N=6 independent biological replicates. 2-way ANOVA; Sidák's multiple comparison tests. **c** Mitochondria perimeter of CDK4-WT and -KO tumor xenografts. n=mitochondria number accounting for 30 (CDK4-WT) and 41 (CDK4-KO) cells and from N=4 montages from 2 different tumor xenografts. Two-sided Unpaired T-test. **d** Mitochondrial number per cell of CDK4-WT and -KO TNBC cells according to electron micrographs (n=16 CDK4-WT cells and n=15 CDK4-KO cells). Representative of N=1 on 3 independent biological replicates. Two-sided Unpaired T-test. **e** GSEA Analysis for REACTOME\_MITOCHONDRIAL\_BIOGENESIS datasets from RNA-seq data on CDK4-WT and -KO TNBC cells. **f** Relative mRNA levels of *POLMRT*, *TFB1M* and *TFB2M* genes normalized to *PUM1* expression in CDK4-WT and -KO TNBC cells. N=3 independent biological replicates. Multiple two-sided Unpaired T-tests. **g** Mitochondrial aspect ratio (major axis/minor axis) and form factor (1/circularity) of CDK4-WT and -KO TNBC cells according to electron micrographs. n=mitochondria number representative from N=3 independent biological replicates. Representative of N=1 on 3 independent biological replicates. Two-sided Mann-Whitney Test. **h** Mitochondrial aspect ratio and form factor of CDK4-WT and -KO tumors xenografts. n=mitochondria number representative from 30 (CDK4-WT) and 41 (CDK4-KO) cells of N=2 tumor xenografts. Two-sided Unpaired T-tests **i** GSEA Analysis for GOBP\_MITOCHONDRIAL\_FUSION datasets from RNA-seq data on CDK4-WT and -KO TNBC cells. **j-k** Immunoblots and relative protein levels of <sup>5780</sup>RB, <sup>5616</sup>DRP1, DRP1 and Tubulin (TUB) and MEM code of TBNC cells pretreated cells with Vehicle or Abemaciclib (Abema) for 8 days. N=3 independent biological replicates. Two-sided Unpaired T-tests. **l** Representative pictures of mitochondria staining using Mitotracker of TBNC cells pretreated cells with Vehicle or Abema for 9 days. Associated quantification of mitochondrial aspect ratio and form factor. N=4 independent biological replicates representing of n=23 (CDK4-WT) and n=20 (CDK4-KO) cells. Two-sided Paired T-tests. Exact *p-values* are displayed in italic (bold italic if <0.05).



### Supplementary Figure 5: CDK4 regulates ER-mitochondrial calcium signaling

**a-b** Maximum amplitude/peak and area under the curve (AUC) from basal mitochondrial calcium levels of CDK4-WT and CDK4-KO TNBC cells upon Thapsigargin (TG) (2  $\mu$ M) or Histamine (Hist) (50  $\mu$ M) injections. N=4 independent biological replicates representing a total of n=148 cells for 13 injections (WT-TG), n=142 cells for 13 injections (KO-TG), n=133 cells for 10 injections (WT-Hist.) and n=141 cells for 12 injections (KO-Hist.). Two-sided Paired T-tests. **c** Relative mitochondrial calcium levels of CDK4-WT and -KO TNBC cells upon Hist injections. Representative curve based on 4mtD3CPV fluorescence (Ratio YFP/CFP), normalized to baseline before injection. N=3 independent biological replicates. Arrow: time of injection. **d-e** Associated quantification of the AUC or maximum amplitude/peak of CDK4-WT and -KO TNBC cells upon Hist injections. N=12 injections, from 3 independent biological replicates representing a total of n=193 (WT-Hist.), n=229 cells (KO-Hist.). Two-sided Paired T-tests. **f-g** Maximum amplitude/peak and AUC from basal cytosolic calcium levels upon TG or Hist injections. N=3 independent biological replicates representing a total of n=107 cells for 9 injections (WT-TG), n=123 cells for 9 injections (KO-TG), n=121 cells for 9 injections (WT-Hist.) and n=118 cells for 9 injections (KO-Hist.). Two-sided Paired T-tests. **h** Maximum amplitude/peak from basal mitochondrial calcium levels of CDK4-WT, -KO TNBC cells transfected with empty plasmid HA (HA\_Tr.) and -KO TNBC cells expressing endogenous CDK4 (CDK4\_Tr.) upon TG treatment. N=6 injections accounting 2 biological replicates representing a total of n=75 cells (WT/HA\_Tr.), n=55 cells (KO/HA\_Tr.) and n=75 cells (KO/CDK4\_Tr.). RM 1 way ANOVA; Tukey's multiple comparisons test. **i-j** Immunoblots and relative protein levels of CDK4, <sup>5780</sup>RB, ITPR2, ITPR3, VDAC1, MCU and Tubulin (TUB) and MEM code of CDK4-WT and -KO TNBC cells, pretreated with siCtrl, siITPR3, siVDAC1, siMCU, siITPR3/siVDAC1 or siVDAC1/siMCU. N=3 independent biological replicates. RM 1 way ANOVA; Tukey's multiple comparisons test. **k** Quantification of the number of CDK4-WT and -KO TNBC cells, pretreated with siCtrl, siITPR3, siVDAC1, siMCU, siITPR3/siVDAC1 or siVDAC1/siMCU. Three different independent loadings of the same samples were performed (#1: ITPR3 / #2: CDK4, <sup>5780</sup>RB, ITPR2, MCU and TUB / #3: VDAC1 and RB) with subsequent same antibodies/exposure conditions. N=3 independent biological replicates. 2-way ANOVA; Sidák's multiple comparison tests. *p-value* are indicated as numbers for this specific panel. Exact *p-values* are displayed in italic (bold italic if <0.05).

### Supplementary Figure 6: CDK4 enhances Mitochondria-ER Contacts in TNBC

**a** Minimum ER-mitochondrion distance in analyzed MERCs. N=3 independent biological replicates representing n (CDK4-DWT) = 353 MERCs and n (CDK4-KO) = 351 MERCs. Two-sided Mann-Whitney Test. **b** Quantification of the number of MERCs per mitochondrion of CDK4-WT and -KO xenografts. Representative of N=2 independent xenograft samples representing a total of n (WT) = 44 cells and n

(KO) = 37 cells. Two-sided Mann-Whitney Test. **c** Representative electron micrographs of CDK4-WT and -KO tumor xenografts. Scale bars: 5 $\mu$ m. Red arrows indicate Mitochondria-ER Contacts (MERCs). **d** Representative micrographs of CDK4-WT and CDK4-KO TNBC cells immunolabeled with DAPI (blue), mitochondrial marker ATP5A (green), ER marker SEC61B (red). Quantification of thresholded Manders' coefficient (ATP5A-SEC61B) normalized to SEC61B staining. N=3 independent biological replicates accounting for n=56 cells (WT) and n=56 cells (KO). Two-sided Paired T-test. **e** Quantification of thresholded Manders' coefficient (ATP5A-CANX normalized to SEC61B staining of CDK4-WT and CDK4-KO TNBC cells. N=3 independent biological replicates accounting for n=33 cells (WT) and n=33 cells (KO). Two-sided Paired T-test. **f** Proximity Ligation Assay (PLA) using VAPB and PTPIP51 antibodies in CDK4-WT with different antibodies combinations. Associated quantification of VAPB-PTPIP51 dots per cell. N=4 independent biological replicates. Ordinary 1-Way ANOVA; Holm-Šídák's multiple comparisons test. **g** Proximity Ligation Assay (PLA) using VDAC1 and ITPR1 antibodies in CDK4-WT and -KO TNBC cells transfected with siCtrl or siVDAC1 with different antibodies combinations. Associated quantification of ITPR1-VDAC1 dots per cell. N=4 independent biological replicates. Ordinary 1-Way ANOVA; Holm-Šídák's multiple comparisons test. Exact *p-values* are displayed in italic (bold italic if <0.05).

#### **Supplementary Figure 7: PKA activity is regulated by CDK4 but is not sufficient to mediate apoptosis**

**a** Heatmap of InKA analysis for kinase activity. Code in CDK4-WT and CDK4-KO TNBC cells. N=4 independent biological replicates. **b** Phosphomotif and putative score of phosphorylation S83 by CDK4 of PRKAR1A and PRKAR1B from Phosphosite database. **c** Proximity Ligation Assay (PLA) using Myc and HA antibodies in CDK4-KO TNBC cells, previously transfected with CDK4-Myc, PRKAR1A-HA, PRKAR1B-HA plasmids. Quantification of Myc-HA dots per cell. PLA antibodies associations used are indicated below. N=6 biological replicates. Ordinary 1-Way ANOVA; Holm-Šídák's multiple comparisons test. Exact *p-values* are displayed in italic (bold italic if <0.05).

#### **Supplementary Figure 8: MERCs-PKA activity is regulated by CDK4 and drives ER-MT calcium signaling**

**a** Plot representing relative abundance of proteins detected through LC-MS/MS analyses in both whole cell lysate (WCL) and MERCs fractions of CDK4-WT TNBC cells. Student's T-test difference displays relative protein enrichment in MERCs fractions of CDK4-WT TNBC cells. **b** Volcano plot of phosphoproteomics data from the MERCs fraction of CDK4-WT and -KO TNBC cells. **c** Enrichment analysis on

phospho-peptides found in MERCS fraction of CDK4-WT and -KO TNBC cells. Benj. Hoch. FDR value ranges are displayed.

**Supplementary Figure 9: CDK4 activity is positively correlated with apoptosis signature and better response to neoadjuvant chemotherapy (NAC) in TNBC patients.**

**a** Dichotomized standardized survival curves showing recurrence free survival (RFS) probabilities in two subsets of patients according to their gene score expression based on median MERC signature, PKA Phosph. CREB score and BIOCARTA CREB score. 95% confidence intervals are displayed. SCAN-B TNBC patients treated with chemotherapy only. n=143 (High) and n=133 (Low) patients.

**Supplementary Figure 10: CDK4 promotes mitochondrial fitness and metabolic flexibility through balanced calcium signaling**

**a** Seahorse curves of oxygen consumption rates (OCR) from CDK4-WT and CDK4-KO MDA-MB-231 TNBC cells N=4 independent biological replicates. **b** Seahorse quantitative analysis of oxygen consumption rate (OCR). Basal OCR was evaluated in resting conditions, ATP-linked production OCR upon Oligomycin treatment, Maximal Respiration and proton leak OCR upon FCCP treatment. N=4 independent biological replicates. Multiple two-sided paired T-tests. **c** Energy phenotype profile determining oxygen consumption rates (OCR) in function of extracellular acidification rates (ECAR) of CDK4-WT and CDK4-KO TNBC cells in media containing Glucose (10 mM)/No galactose (Gluc+/Gal-), No glucose/Galactose (10 mM) (Gluc-/Gal+), or No glucose/No galactose (Gluc-/Gal-). Division of graph in 4 quarters were performed as following: Low OCR/Low ECAR = Quiescent, Low OCR/High ECAR = Glycolytic, High OCR/Low ECAR = Oxidative, High OCR/High ECAR = Mix Active. N=4 independent biological replicates. **d** Seahorse quantitative analysis of oxygen consumption rate (OCR) CDK4-WT and CDK4-KO TNBC cells in media containing Glucose (10 mM)/No galactose (Gluc+/Gal-), No glucose/Galactose (10 mM) (Gluc-/Gal+), or No glucose/No galactose (Gluc-/Gal-). Proton leak OCR was evaluated upon FCCP treatment. N=4 independent biological replicates. 2-way ANOVA; Tukey's multiple comparison tests. Exact *p-values* are displayed in italic (bold italic if <0.05).

**Supplementary Figure 11: Graphical illustration summarizing the role of CDK4 in the regulation of mitochondrial-ER contacts.**

The results suggest that CDK4 regulate the mitochondria-ER contacts through direct effects on both tethers and specific kinases, such as PKA, that regulate the transfer of calcium from the ER to the mitochondria. Under specific conditions, this increase in calcium is required to maintain mitochondrial dynamics, mitochondrial function, and apoptosis.

### **Supplementary Table 1**

List of 176 MERC-associated proteins ranked by alphabetical order. Names are labeled according to gene nomenclature.

### **Supplementary Table 2**

List of 141 detected MERC-associated proteins in the MERCs fraction of CDK4-WT and -KO MDA-MB-231 TNBC cells, ranked by alphabetical order. Described and main-associated function(s) of each protein is indicated. Names are labeled according to gene nomenclature.

### **Supplementary Table 3**

Table of clinical dataset showing recurrence-free survival (RFS) probabilities in two subsets of patients according to their gene score expression based on median of Cyclin D1 (CCND1), Cyclin D2 (CCND2), Cyclin D3 (CCND3), signature of CCNDs, CDK4, Mitochondria-ER contact signature (MERC), PKA Phosph. CREB GSEA and BIOCARTE CREB GSEA. SCAN-B TNBC patients treated with chemotherapy only. RFS: Recurrence-free survival. OS: Overall survival. HR: Hazard ratio. Cox Proportional Hazards Survival Regression.

### **Supplementary Table 4**

List of primers.

### **Supplementary Table 5**

List of antibodies, including references, dilutions and applications. WB: Western Blot, IF: Immunofluorescence. PLA: Proximity Ligation Assay.

### **Supplementary Movie 1**

Time-lapse acquisition of CDK4-WT MDA-MB-231 TNBC cells. Nanolive video constituted by 45 frames with one frame every 2 minutes.

### **Supplementary Movie 2**

Time-lapse acquisition of CDK4-KO MDA-MB-231 TNBC cells. Nanolive video constituted by 45 frames with one frame every 2 minutes.
