# Supplementary material for: CDK4 inactivation inhibits apoptosis via mitochondria-ER contact remodeling in triple-negative breast cancer
Source: PubMed Central journal article supplement (PMC11718081; doi:10.1038/s41467-024-55605-z), 2025-01-09
Supplement: 41467_2024_55605_MOESM3_ESM.pdf [file 41467_2024_55605_MOESM3_ESM.pdf]

1 **Supplementary Movie 1**

2 Time-lapse acquisition of CDK4-WT MDA-MB-231 TNBC cells. Nanolive video constituted by  
3 45 frames with one frame every 2 minutes.

4

5 **Supplementary Movie 2**

6 Time-lapse acquisition of CDK4-KO MDA-MB-231 TNBC cells. Nanolive video constituted by  
7 45 frames with one frame every 2 minutes.

8
